# Supplementary material
Source: publisher figshare collection journal article supplement (https://acs.figshare.com/ndownloader/files/5205205)
Supplement: Supplementary file 1 [file 5205205]

## Supplementary File

# An Integrative Proteomic Approach Identifies Novel Cellular SMYD2 Substrates

Hazem Ahmed<sup>1</sup>, Shili Duan<sup>2</sup>, Cheryl Arrowsmith<sup>1,2</sup>, Dalia Barsyte-Lovejoy<sup>1</sup>, Matthieu Schapira<sup>1,3,\*</sup>

<sup>1</sup>Structural Genomics Consortium, University of Toronto, 101 College Street, MaRS Centre, South Tower, Toronto, ON M5G 1L7, Canada.

<sup>2</sup>Princess Margaret Cancer Centre and Department of Medical Biophysics, University of Toronto, Toronto, ON M5S 1A8, Canada.

<sup>3</sup>Department of Pharmacology and Toxicology, University of Toronto; 1 King's College Circle, Toronto, ON M5S 1A8, Canada.

Running Title: Novel Cellular SMYD2 Substrates

Keywords: SMYD2, non-histone substrates, lysine methylation, data integration, pan-methyl lysine antibody.

\* Correspondence to: [matthieu.schapira@utoronto.ca](mailto:matthieu.schapira@utoronto.ca)

**Figure S-1: Mapping all 127 hits onto protein interaction networks.** STRING database<sup>1</sup> was used to generate protein functional association and physical interaction networks for all 127 proteins passing our two hard filters.

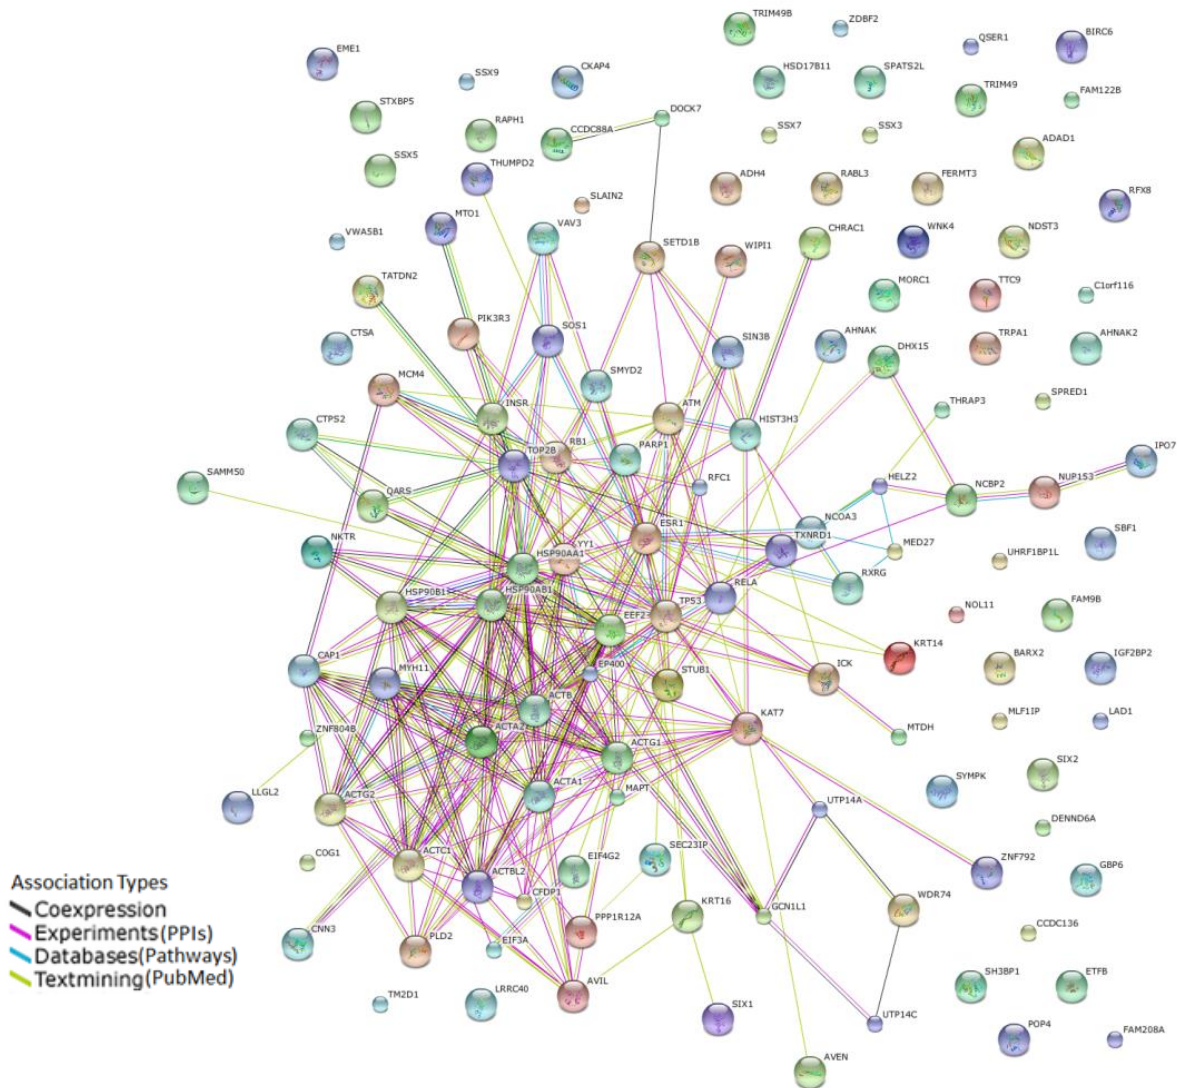

**Figure S-2: Identified novel SMYD2 substrates can be nuclear or cytoplasmic.** Cellular localization of confirmed SMYD2 substrate GFP fusions (green). DAPI images (blue) below indicate nuclei. The scale bar represents 15 $\mu$ m.

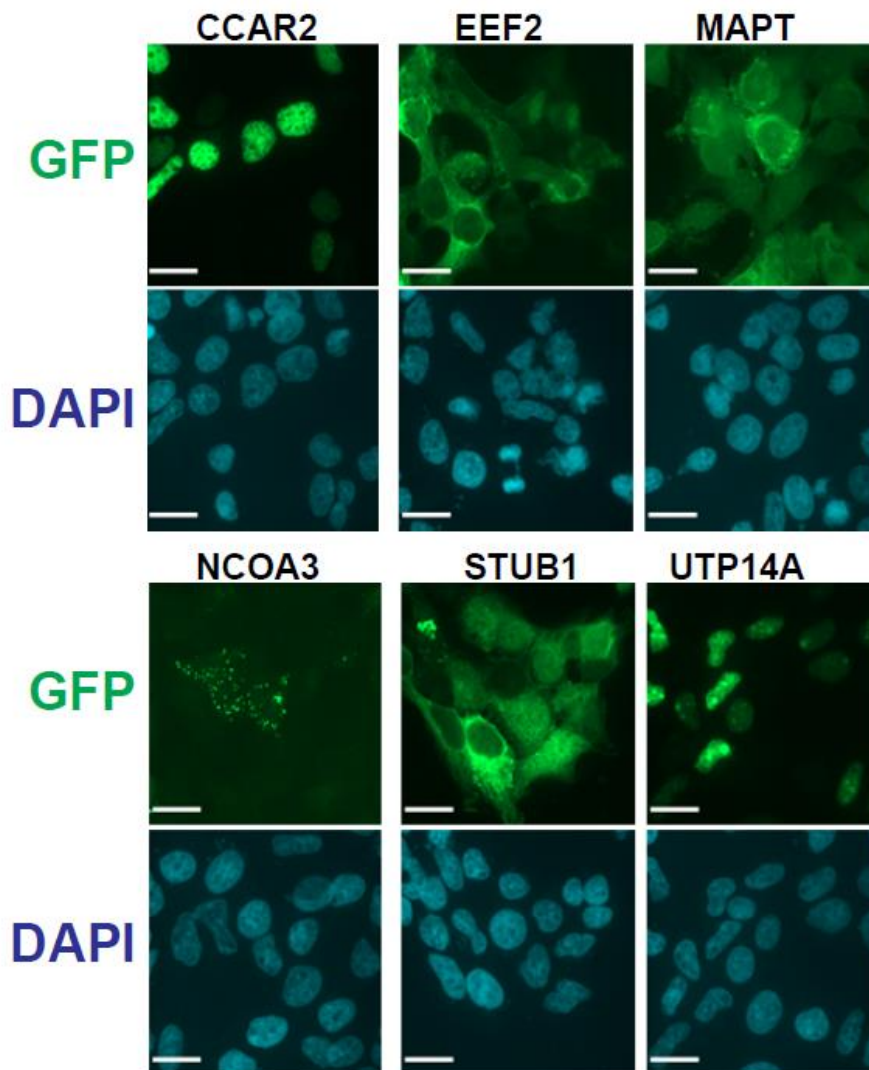

**Figure S-3: A more permissive SMYD2 selectivity profile produces novel substrate candidates.** A. Enriched SMYD2 specificity profile used in this work. B. Substrate candidates with major mismatches (bold) from the enriched SMYD2 specificity profile but that directly interact experimentally with SMYD2<sup>2</sup> are shown.

|          |                                                                                                               |       |          |   |          |          |
|----------|---------------------------------------------------------------------------------------------------------------|-------|----------|---|----------|----------|
| <b>A</b> | [LFM] <sub>-1</sub> -[K <sub>me1</sub> ]-[AFYMSHRK <u>G</u> ] <sub>+1</sub> -[LYK <u>Q</u> SPG] <sub>+2</sub> |       |          |   |          |          |
| <b>B</b> | TP53                                                                                                          | K370  | L        | K | S        | K        |
|          | BTF3                                                                                                          | K2    | M        | K | E        | T        |
|          | NACA                                                                                                          | K76   | <b>R</b> | K | A        | <b>M</b> |
|          | CBWD2                                                                                                         | K204  | <b>K</b> | K | A        | <b>I</b> |
|          | CKAP5                                                                                                         | K1093 | <b>S</b> | K | <b>P</b> | <b>M</b> |
|          |                                                                                                               |       | -1       | * | 1        | 2        |

**Table S-1: Summary of filters implemented and associated data source.** Hard filters must be met. Soft filters are selection criteria used as weighting factors.

| Questions (in a descending order of importance to the selection process)                         | Data Source                                        | Filter Type |
|--------------------------------------------------------------------------------------------------|----------------------------------------------------|-------------|
| Is the lysine under investigation reported to be methylated, in the first place?                 | Phosphosite Plus DB, Mass Spec experiments         | Hard        |
| Is the flanking sequence around this lysine similar to SMYD2 substrate preference?               | Published Specificity + Published Substrates       | Hard        |
| Does the KMT target having this lysine directly interact with SMYD2                              | Published interaction data + Curated PPI Databases | Soft        |
| Does it share interaction partners with SMYD2, e.g., HSP90, or other SMYD2 published substrates? | STRING Interaction network + clustering analysis   | Soft        |
| Is the KMT target localized in the cytoplasm?                                                    | UniProt, GeneCards DB                              | Soft        |
| Is the KMT target notably expressed in the heart and/or brain?                                   | PubMed, Human Proteome Map + Human Protein Atlas   | Soft        |
| Is the KMT target functionally related to SMYD2? Similar cellular process, biological pathway?   | Gene Ontology + Reactome, KEGG and STRING-DB       | Soft        |
| Is there a reliable literature support associating the KMT target with SMYD2?                    | Text Mining, STRING-DB                             | Soft        |

**Table S-2: 160 sites selected from the methylome matching our permissive SMYD2 signature motif.** A single methylation site may be present more than once. For example, TP53-K370 is present three times because it is reported to be mono- di- and tri-methylated in the methylome.

| Supplementary Table 2: 160 sites in 127 proteins selected from the methylome matching our permissive SMYD2 recognition motif. |           |              |              |                  |          |             |  |
|-------------------------------------------------------------------------------------------------------------------------------|-----------|--------------|--------------|------------------|----------|-------------|--|
| Uniprot_ID                                                                                                                    | Name      | Meth Residue | Flanking Seq | Meth Degree      | Domain   | Source      |  |
| A0JNW5                                                                                                                        | UHRF1BP1L | K1077        | RTLKSQS      | MONO-METHYLATION | N/A      | Phosphosite |  |
| A4D1E1                                                                                                                        | ZNF804B   | K113         | KALKRLH      | MONO-METHYLATION | N/A      | Wu et al.   |  |
| A6NDI0                                                                                                                        | TRIM49B   | K202         | EMLKKKG      | DI-METHYLATION   | N/A      | Phosphosite |  |
| A7E2D7                                                                                                                        | EP400     | K1423        | AKLKASR      | MONO-METHYLATION | N/A      | Wu et al.   |  |
| B4DXM8                                                                                                                        | PIK3R3    | K328         | QDLKKQA      | DI-METHYLATION   | N/A      | Phosphosite |  |
| B7Z2S5                                                                                                                        | TXNRD1    | K38          | PTLKAYQ      | MONO-METHYLATION | N/A      | Wu et al.   |  |
| E9PL73                                                                                                                        | FAM9B     | K2           | _MKAKK       | MONO-METHYLATION | N/A      | Wu et al.   |  |
| F5H0L8                                                                                                                        | SEC23IP   | K273         | THFKKSL      | MONO-METHYLATION | N/A      | Wu et al.   |  |
| F5H335                                                                                                                        | EIF3A     | K36          | DVMKSKK      | MONO-METHYLATION | N/A      | Wu et al.   |  |
| F8W930                                                                                                                        | IGF2BP2   | K493         | AQFKAQG      | MONO-METHYLATION | N/A      | Wu et al.   |  |
| F8WE41                                                                                                                        | NCBP2     | K7           | GLLKALR      | MONO-METHYLATION | N/A      | Wu et al.   |  |
| H0Y901                                                                                                                        | LAD1      | K18          | SSLKRSR      | MONO-METHYLATION | N/A      | Wu et al.   |  |
| H0Y9L2                                                                                                                        | SLAIN2    | K50          | TSLKAKQ      | MONO-METHYLATION | N/A      | Wu et al.   |  |
| H3BS86                                                                                                                        | STUB1     | K2           | _MKGKE       | MONO-METHYLATION | N/A      | Wu et al.   |  |
| H7C5D0                                                                                                                        | DENND6A   | K82          | HFLKSPN      | MONO-METHYLATION | N/A      | Wu et al.   |  |
| I3L2C9                                                                                                                        | PLD2      | K388         | IMLKAKA      | MONO-METHYLATION | N/A      | Wu et al.   |  |
| J3KPA2                                                                                                                        | TM2D1     | K5           | HILKGSP      | MONO-METHYLATION | N/A      | Wu et al.   |  |
| J3QRV5                                                                                                                        | LLGL2     | K647         | KSLKKSL      | MONO-METHYLATION | N/A      | Wu et al.   |  |
| O00515                                                                                                                        | LAD1      | K367         | SSLKRSS      | MONO-METHYLATION | N/A      | Phosphosite |  |
| O14974                                                                                                                        | PPP1R12A  | K1002        | EELKMLP      | DI-METHYLATION   | N/A      | Phosphosite |  |
| O60225                                                                                                                        | SSX5      | K52          | VYMKRKY      | MONO-METHYLATION | N/A      | Phosphosite |  |
| O75366                                                                                                                        | AVIL      | K319         | IKMKSYF      | MONO-METHYLATION | Gelsolin | Phosphosite |  |

See excel file for full list

## References

- (1) Franceschini, A.; Szklarczyk, D.; Frankild, S.; Kuhn, M.; Simonovic, M.; Roth, A.; Lin, J.; Minguez, P.; Bork, P.; von Mering, C., STRING v9. 1: protein-protein interaction networks, with increased coverage and integration. *Nucleic Acids Res.* **2013**, 41, (D1), D808-D815.
- (2) Marcon, E.; Ni, Z.; Pu, S.; Turinsky, A. L.; Trimble, S. S.; Olsen, J. B.; Silverman-Gavrila, R.; Silverman-Gavrila, L.; Phanse, S.; Guo, H., Human-chromatin-related protein interactions identify a demethylase complex required for chromosome segregation. *Cell Rep.* **2014**, 8, (1), 297-310.
